# Supplementary material for: An organic jelly made fractal logic gate with an infinite truth table
Source: PubMed Central journal article supplement (PMC4471884; doi:10.1038/srep11265), 2015-06-18
Supplement: srep11265-s1.pdf [file srep11265-s1.pdf]

The title of all plot contains pH values and density. X axis is emission, Y axis is excitation, values of laser wavelength are in nm scale.

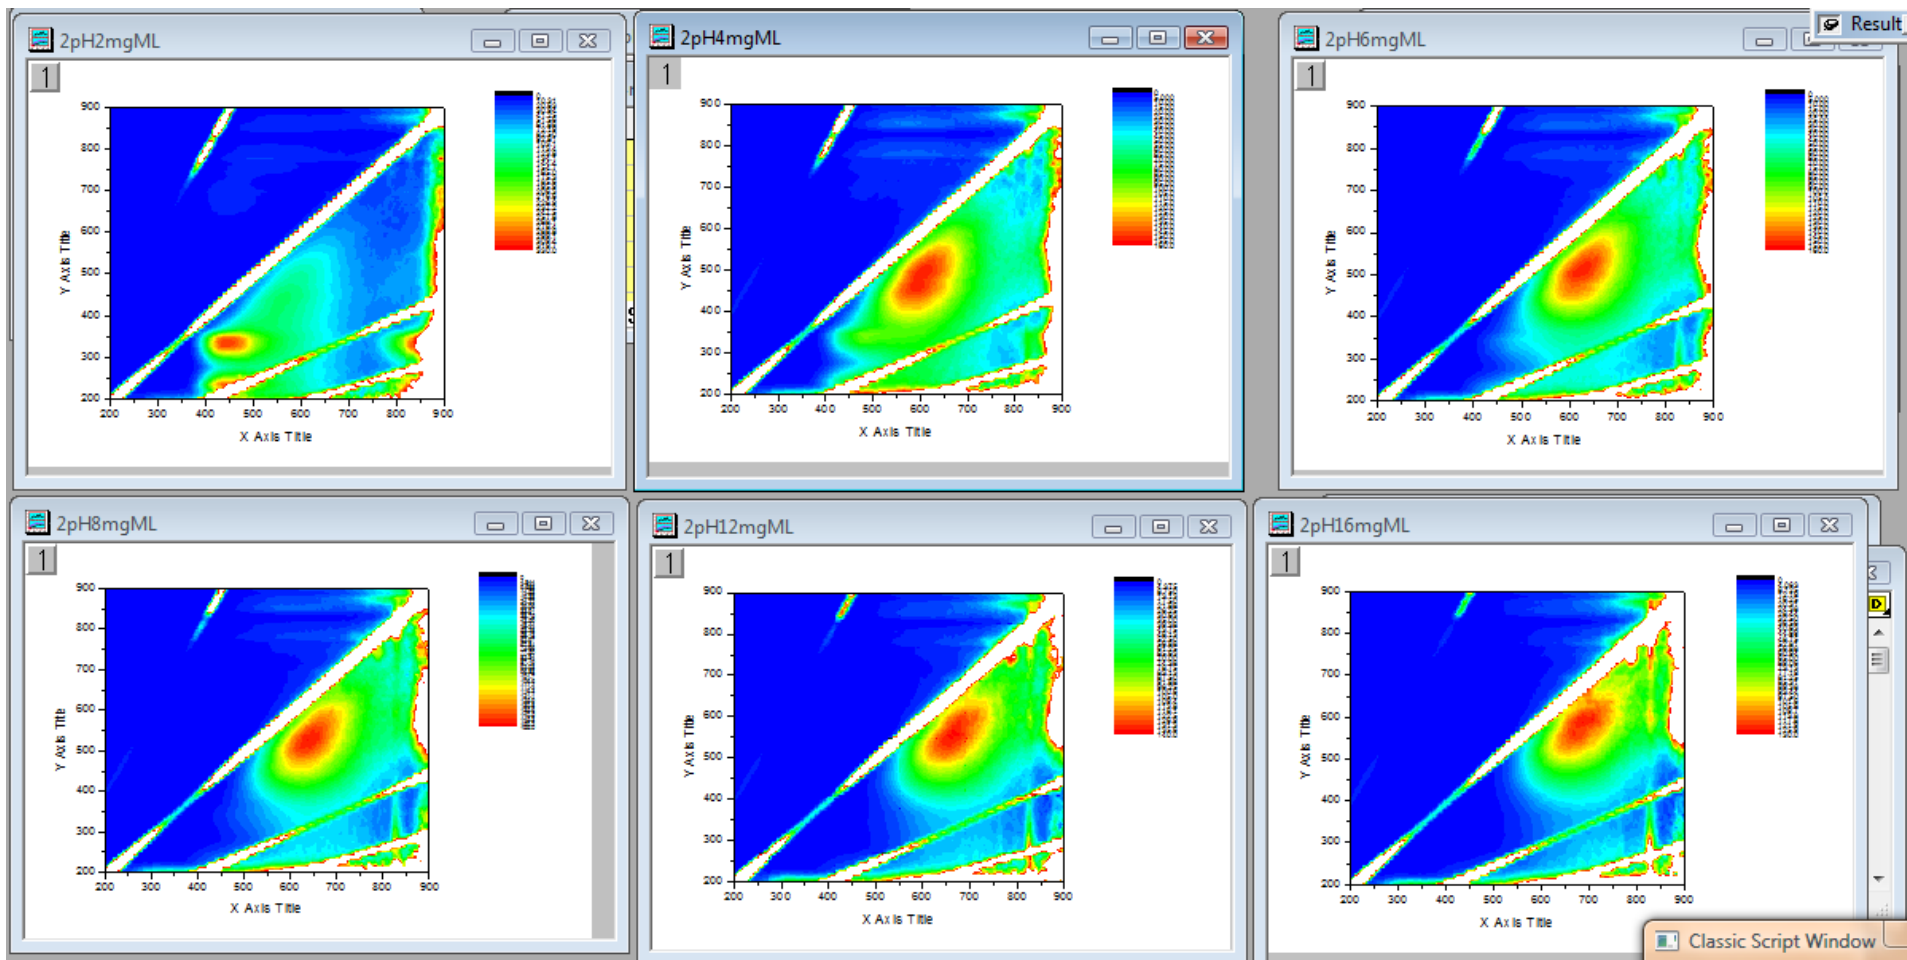

The title of all plot contains pH values and density. X axis is emission, Y axis is excitation, values of laser wavelength are in nm scale.

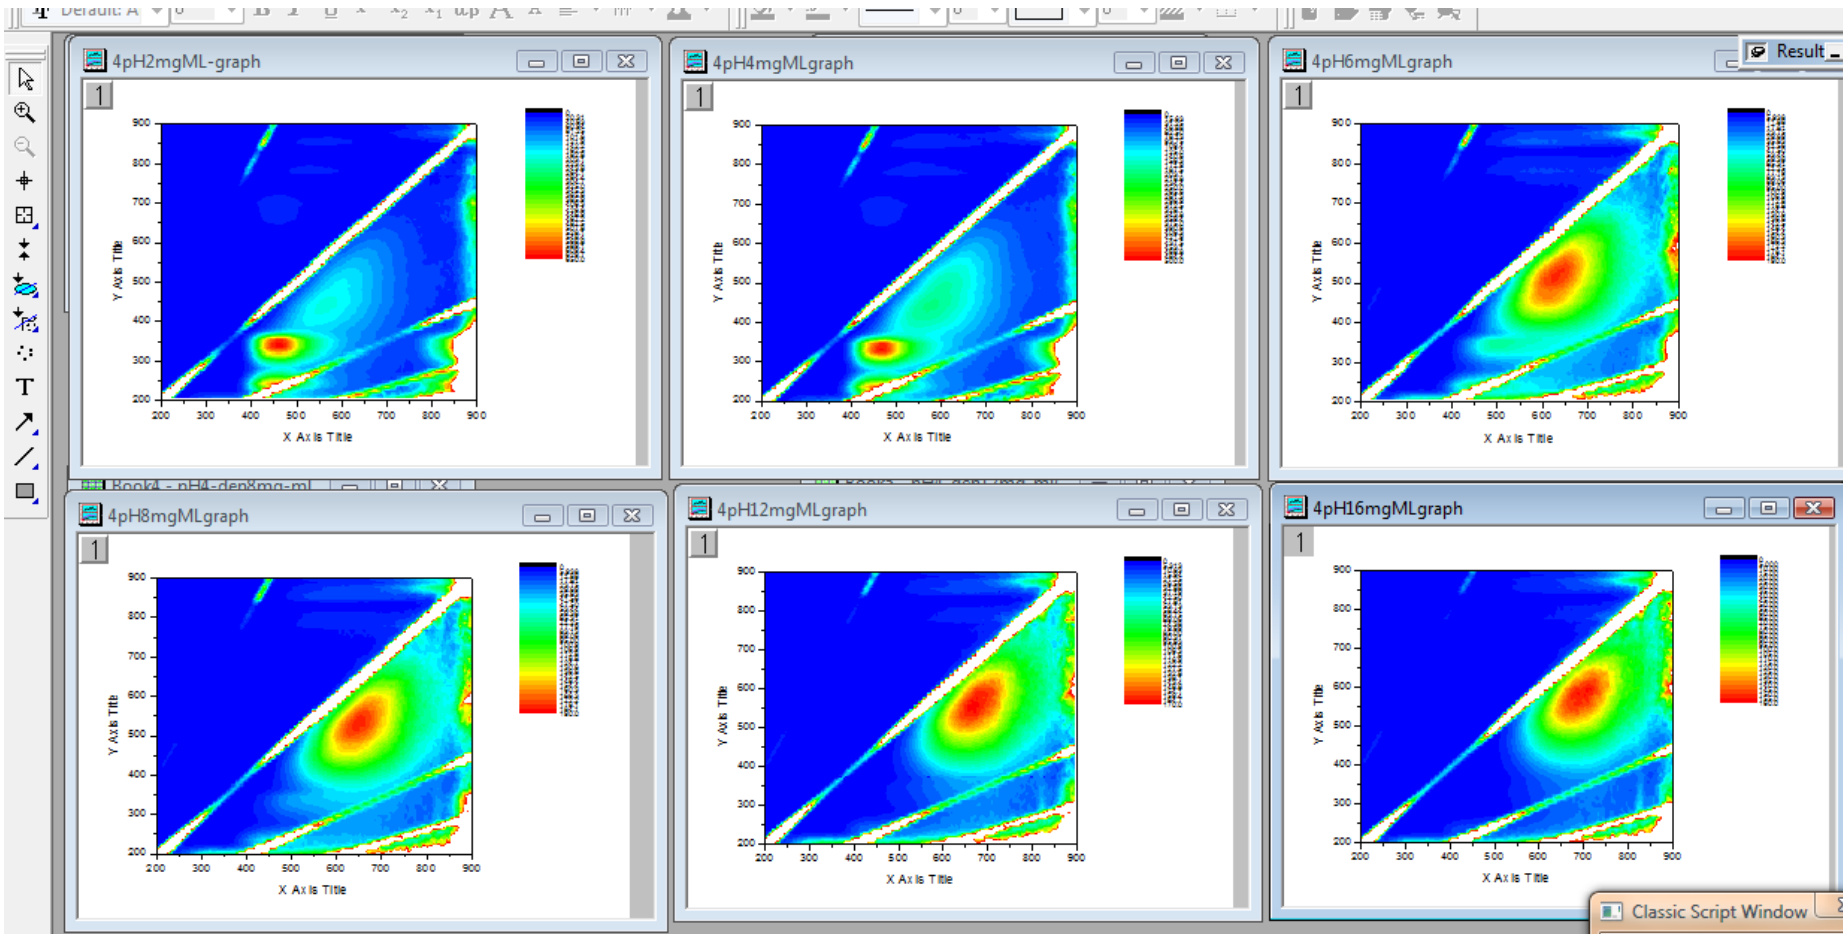

The title of all plot contains pH values and density. X axis is emission, Y axis is excitation, values of laser wavelength are in nm scale.

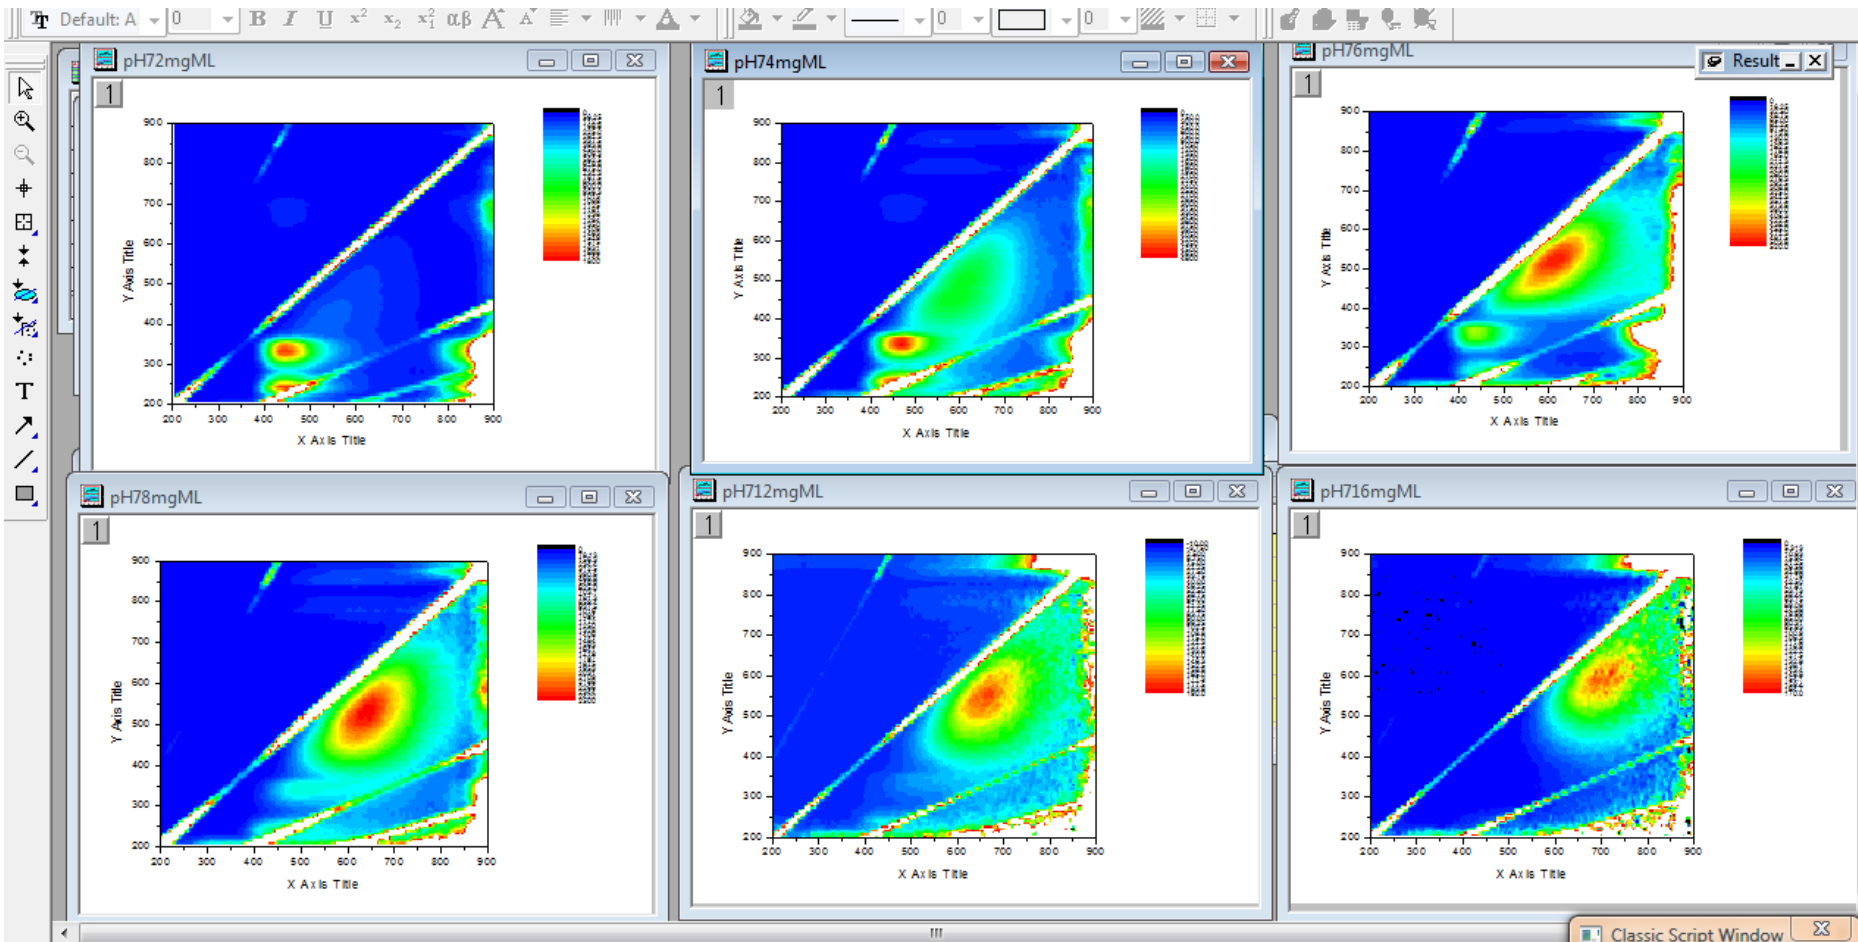

The title of all plot contains pH values and density. X axis is emission, Y axis is excitation, values of laser wavelength are in nm scale.

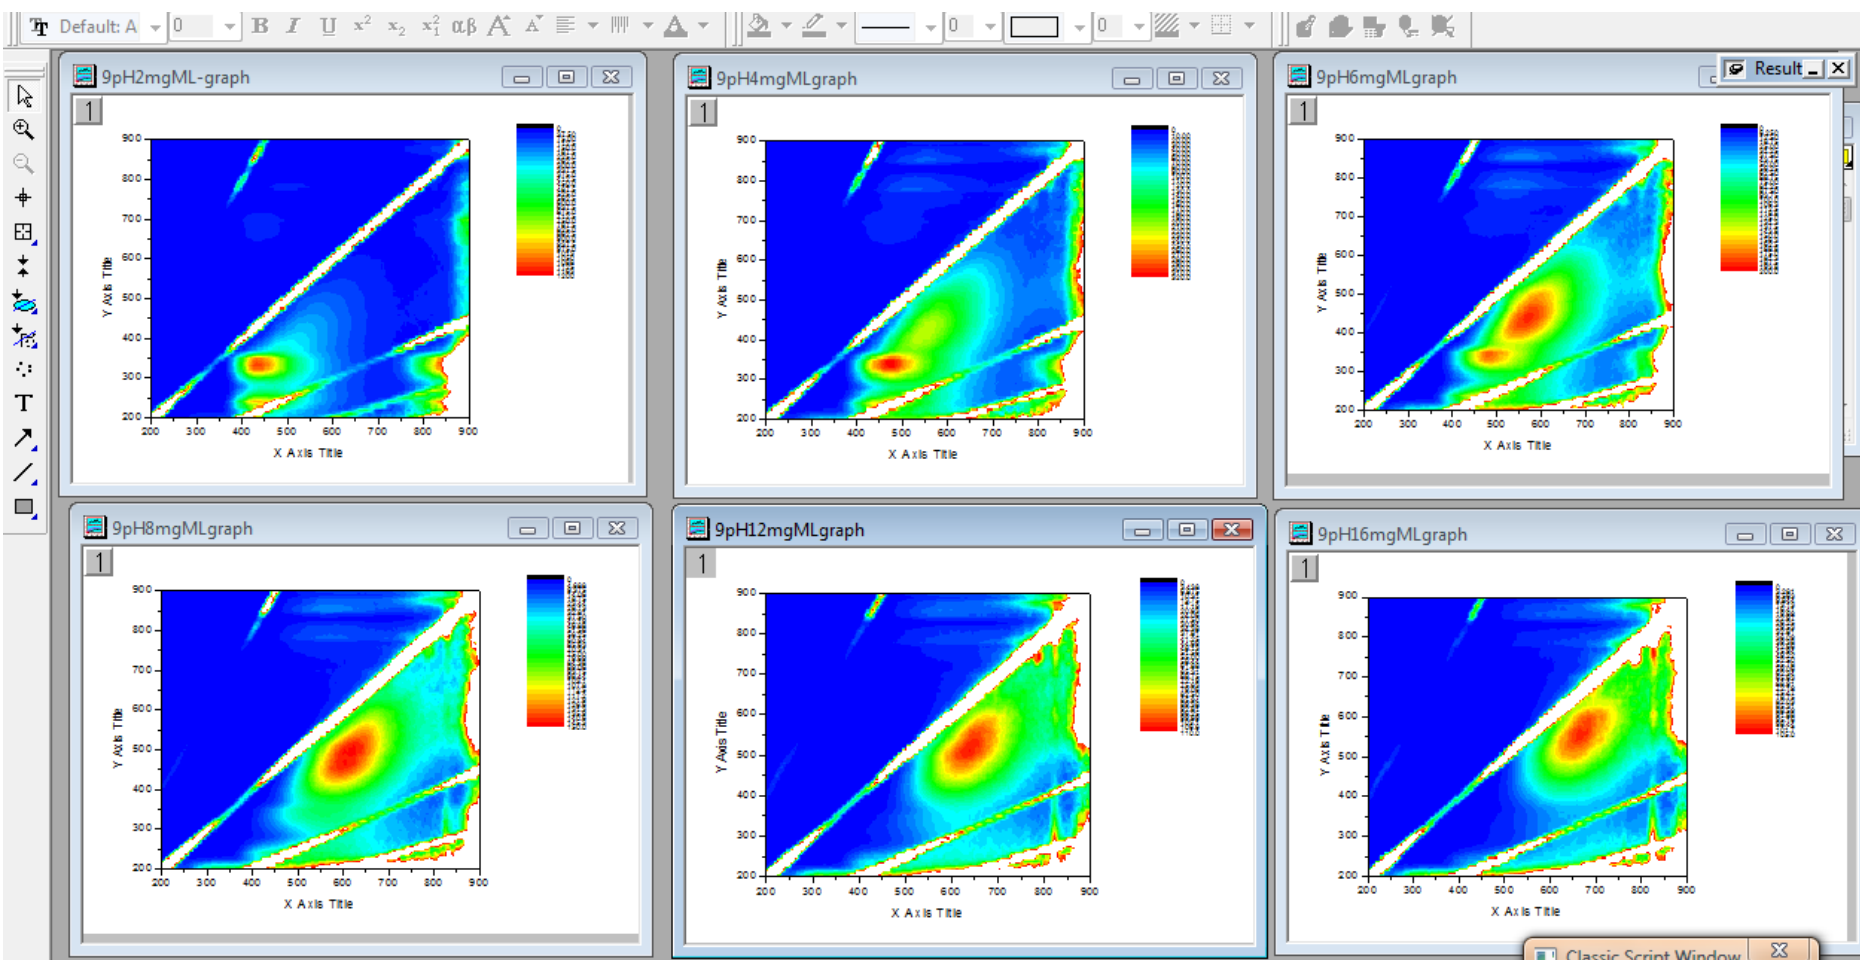

The title of all plot contains pH values and density. X axis is emission, Y axis is excitation, values of laser wavelength are in nm scale.

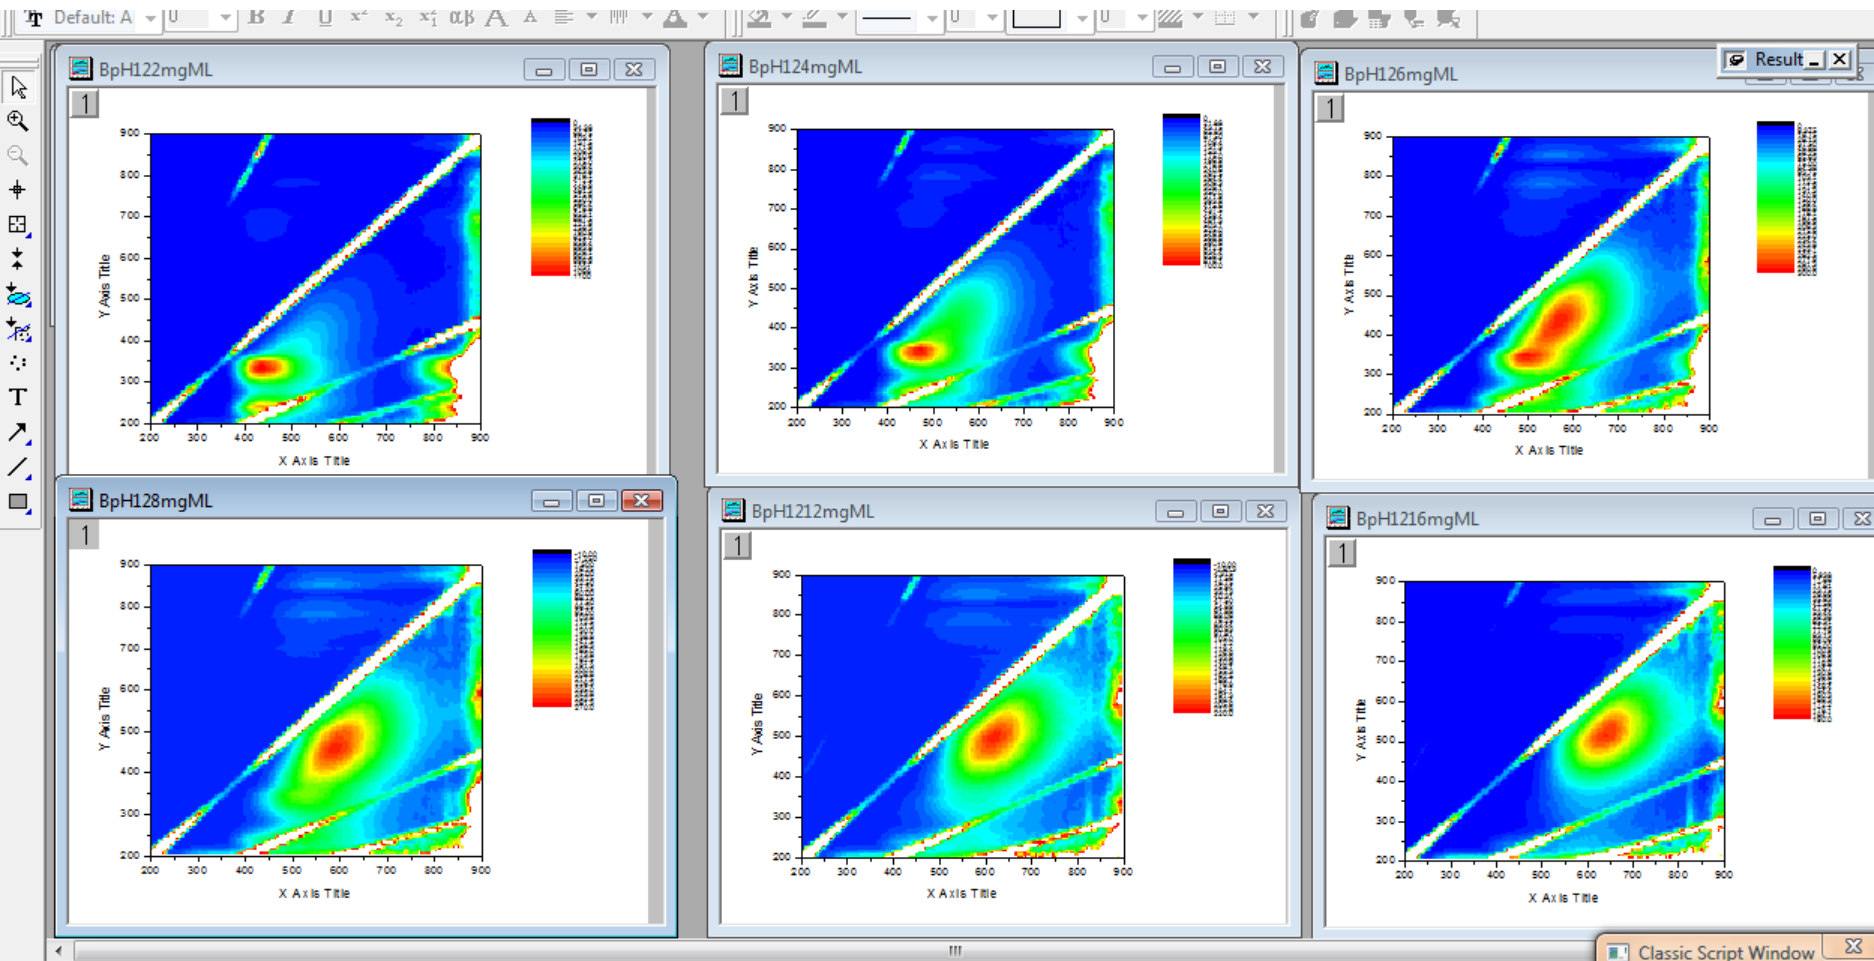

The title of all plot contains pH values and density. X axis is emission, Y axis is excitation, values of laser wavelength are in nm scale.

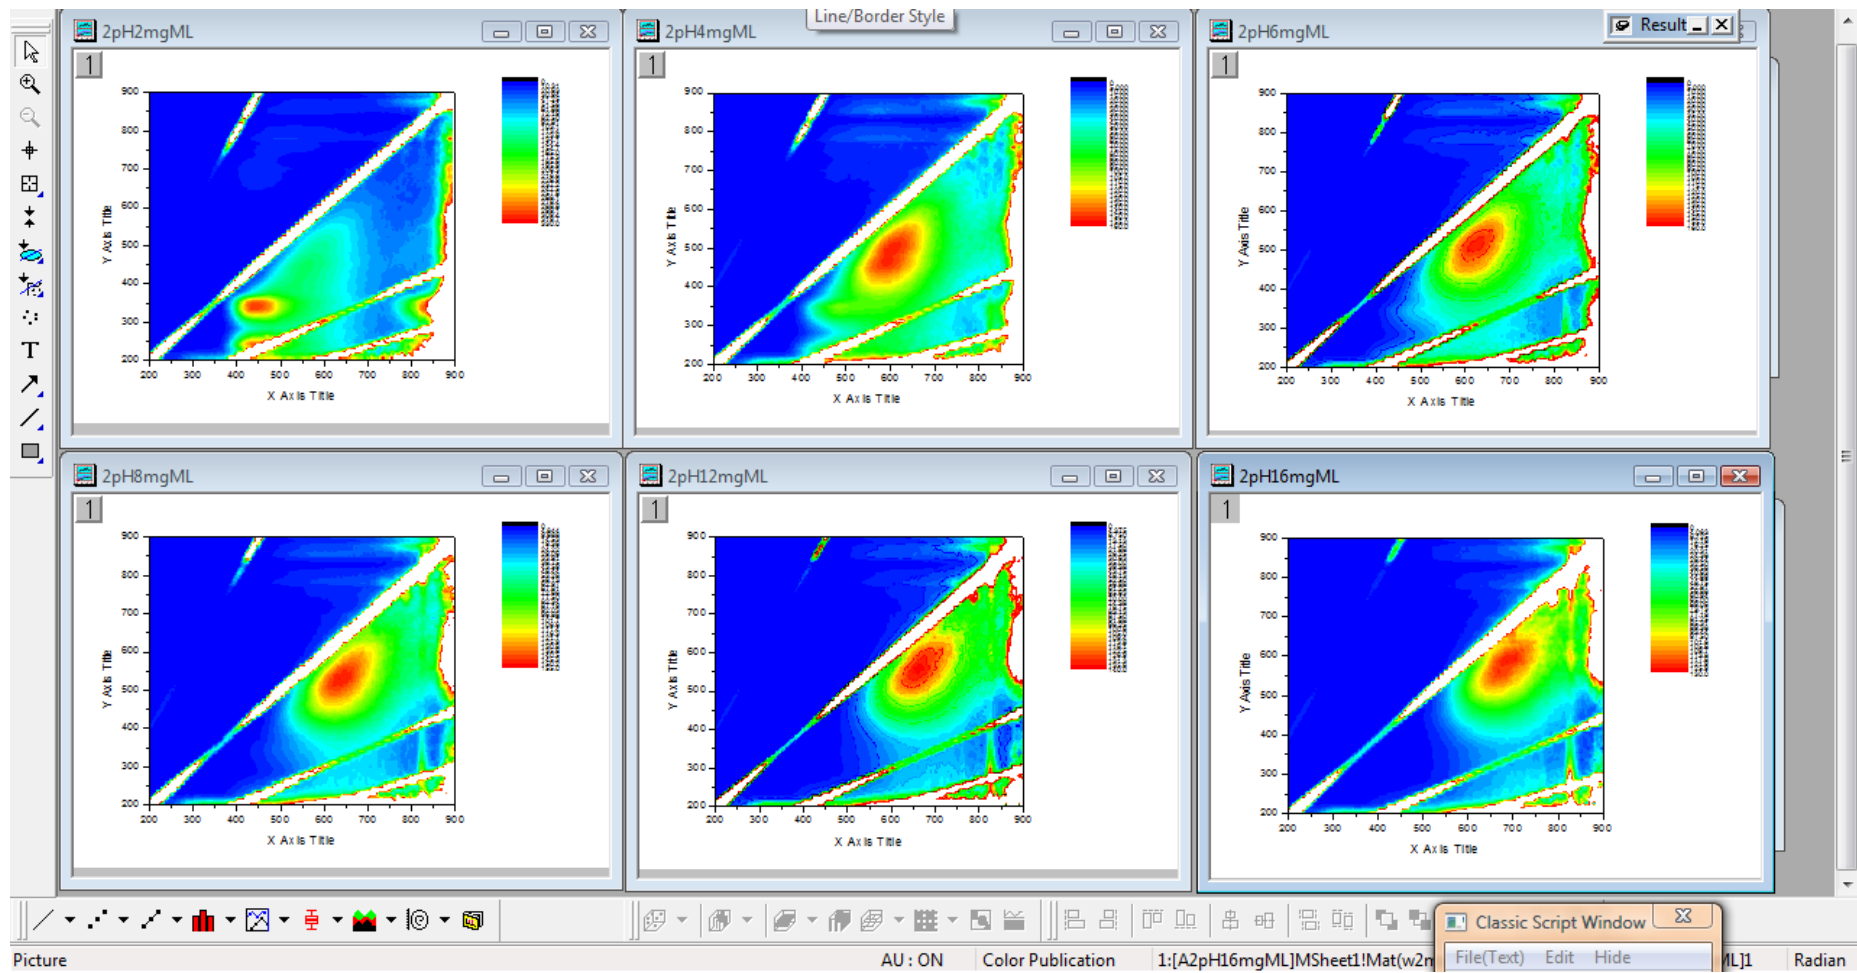

| pH | 2mg/mL                                | 4mg/mL                                            | 6mg/mL                          | 8mg/mL                          | 12mg/mL                         | 16mg/mL                                           |
|----|---------------------------------------|---------------------------------------------------|---------------------------------|---------------------------------|---------------------------------|---------------------------------------------------|
| 2  | Ex-3.67eV/Em-2.79eV;<br>2.79eV/2.20eV | 3.56eV/2.55eV;<br>2.65eV/2.10eV;<br>2.47eV/2.04eV | 2.40eV/1.98eV                   | 2.33eV/1.93eV                   | 2.24eV/1.88eV;<br>2.20eV/1.86eV | 2.20eV/1.86eV;<br>2.10eV/1.81eV;<br>2.07eV/1.76eV |
| 4  | 3.70eV/2.70eV;<br>2.81eV/2.19eV       | 3.71eV/2.67eV;<br>2.77eV/2.16eV                   | 3.62eV/2.47eV;<br>2.40eV/1.97eV | 2.31eV/1.92eV                   | 2.22eV/1.85eV                   | 2.11eV/1.81eV;<br>2.07eV/1.75eV                   |
| 7  | 5.17eV/2.83eV;<br>3.75eV/2.81eV       | 3.72eV/2.63eV;<br>2.73eV/2.11eV;<br>2.46eV/2.01eV | 3.57eV/2.86eV;<br>2.36eV/2.01eV | 3.65eV/2.51eV;<br>2.33eV/1.93eV | 2.23eV/1.84eV                   | 2.04eV/1.72eV                                     |
| 9  | 3.72eV/2.86eV                         | 3.63eV/2.62eV;<br>2.95eV/2.26eV                   | 3.59eV/2.58eV;<br>2.79eV/2.17eV | 2.64eV/2.06eV;<br>2.51eV/2.01eV | 2.42eV/1.93eV<br>2.32eV/1.90eV  | 2.23eV/1.86eV                                     |
| 12 | 3.71eV/2.85eV                         | 3.60eV/2.63eV;<br>3.0eV/2.27eV                    | 3.55eV/2.50eV;<br>2.83eV/2.19eV | 3.55eV/2.88eV;<br>2.70eV/2.11eV | 2.48eV/2.0eV                    | 2.41/1.94eV                                       |
